# Supplementary material
Source: Elsevier journal article supplement (https://www.sciencedirect.com/science/article/pii/S1695403319303698)
Supplement: mmc1 [file S1695403319303698:mmc1.pdf]

**Tabla suplementaria 1.** Variables relativas a los conocimientos generales en primeros auxilios de los participantes.

| ¿Posee conocimientos en primeros auxilios?                                                   | Sí                                                                                                                                                                                                                                                                                                                                                       | 268 (57,0) |        |        |
|----------------------------------------------------------------------------------------------|----------------------------------------------------------------------------------------------------------------------------------------------------------------------------------------------------------------------------------------------------------------------------------------------------------------------------------------------------------|------------|--------|--------|
|                                                                                              | No                                                                                                                                                                                                                                                                                                                                                       | 202 (43,0) |        |        |
| De los que contestaron que sí (n = 268)                                                      |                                                                                                                                                                                                                                                                                                                                                          | fi         | hi-268 | hi-470 |
| <i>Valore sus conocimientos</i>                                                              | Excelentes                                                                                                                                                                                                                                                                                                                                               | 4          | 1,5    | 0,9    |
|                                                                                              | Buenos                                                                                                                                                                                                                                                                                                                                                   | 67         | 25,0   | 14,3   |
|                                                                                              | Regulares                                                                                                                                                                                                                                                                                                                                                | 179        | 66,8   | 38,1   |
|                                                                                              | Malos                                                                                                                                                                                                                                                                                                                                                    | 18         | 6,7    | 3,8    |
|                                                                                              | Muy malos                                                                                                                                                                                                                                                                                                                                                | 0          | 0,0    | 0,0    |
| <i>¿Cuándo ha realizado su última formación?</i>                                             | 0-3 meses                                                                                                                                                                                                                                                                                                                                                | 28         | 10,4   | 6,0    |
|                                                                                              | 4-6 meses                                                                                                                                                                                                                                                                                                                                                | 13         | 4,9    | 2,8    |
|                                                                                              | 7-12 meses                                                                                                                                                                                                                                                                                                                                               | 32         | 11,9   | 6,8    |
|                                                                                              | 13-24 meses                                                                                                                                                                                                                                                                                                                                              | 41         | 15,3   | 8,7    |
|                                                                                              | > 2 años                                                                                                                                                                                                                                                                                                                                                 | 133        | 49,6   | 28,3   |
|                                                                                              | Nunca, soy autodidacta                                                                                                                                                                                                                                                                                                                                   | 21         | 7,8    | 4,5    |
| <i>Ha recibido formación porque...<br/>(Se podía responder más de una)</i>                   | Era obligatorio en el colegio / instituto / universidad...                                                                                                                                                                                                                                                                                               | 30         | 11,2   | 6,4    |
|                                                                                              | Me lo exigieron en el trabajo                                                                                                                                                                                                                                                                                                                            | 58         | 21,6   | 12,3   |
|                                                                                              | Me parece una formación fundamental                                                                                                                                                                                                                                                                                                                      | 162        | 60,4   | 34,5   |
|                                                                                              | Comprendí su importancia tras un grave accidente de un allegado                                                                                                                                                                                                                                                                                          | 3          | 1,1    | 0,6    |
|                                                                                              | Comprendí su importancia tras un grave accidente que sufrí en el pasado                                                                                                                                                                                                                                                                                  | 0          | 0,0    | 0,0    |
|                                                                                              | Comprendí su importancia después de tener hijos/as                                                                                                                                                                                                                                                                                                       | 24         | 9,0    | 5,1    |
|                                                                                              | Otros:                                                                                                                                                                                                                                                                                                                                                   | 22         | 8,2    | 4,7    |
|                                                                                              | Auxiliar de enfermería / enfermera / médico / técnico de emergencias sanitarias / socorrista / realización de cursos / jornadas y actividades programadas / voluntariado / estudiando con mi hijo / estudiando oposiciones de educación / protección civil / importante para la Educación Física / sucesos en el centro educativo: diabetes y epilepsia. |            |        |        |
| De los que contestaron que no (n = 202)                                                      |                                                                                                                                                                                                                                                                                                                                                          | fi         | hi-202 | hi-470 |
| <i>¿Por qué no tiene formación en primeros auxilios?<br/>(Se podía responder más de una)</i> | Poco interés                                                                                                                                                                                                                                                                                                                                             | 2          | 1,0    | 0,4    |
|                                                                                              | Poco tiempo                                                                                                                                                                                                                                                                                                                                              | 45         | 22,3   | 9,6    |
|                                                                                              | No sé dónde puedo hacer un curso                                                                                                                                                                                                                                                                                                                         | 65         | 32,2   | 13,8   |
|                                                                                              | Por el precio                                                                                                                                                                                                                                                                                                                                            | 5          | 2,5    | 1,1    |
|                                                                                              | No me lo había planteado                                                                                                                                                                                                                                                                                                                                 | 107        | 53,0   | 22,8   |
|                                                                                              | Otros:                                                                                                                                                                                                                                                                                                                                                   | 7          | 3,5    | 1,5    |
|                                                                                              | Me inscribí en los cursos de la Xunta de Galicia pero siempre están llenos / Debería ser obligatorio para los docentes / Hice un curso hace años pero habría que hacerlos cada dos / el centro educativo debería ofertar esta formación / falta de oferta / desplazamientos.                                                                             |            |        |        |

Datos expresados mediante frecuencias absolutas (frecuencias relativas)

fi: Frecuencia absoluta

hi: Frecuencia relativa
