# Supplementary material
Source: Elsevier journal article supplement (https://www.sciencedirect.com/science/article/pii/S1695403319303698)
Supplement: mmc2 [file S1695403319303698:mmc2.pdf]

**Tabla Suplementaria 2.** Preguntas relativas al Soporte Vital Básico.

| <b>Preguntas relativas a la secuencia de actuación</b>                                                             |                                                                 |     |            |        |
|--------------------------------------------------------------------------------------------------------------------|-----------------------------------------------------------------|-----|------------|--------|
| <i>¿Sabría actuar ante un niño aparentemente sin vida?</i>                                                         | Sí                                                              |     | 258 (54,9) |        |
|                                                                                                                    | No                                                              |     | 212 (45,1) |        |
| <b>De los que contestaron que sí (n = 258)</b>                                                                     |                                                                 | fi  | hi-258     | hi-470 |
| <i>Ordene la secuencia numerando los pasos</i>                                                                     | Los que lo hicieron bien                                        | 4   | 1,6        | 0,9    |
|                                                                                                                    | Los que lo hicieron mal                                         | 254 | 98,4       | 54,0   |
|                                                                                                                    | Los que aun diciendo que sabían, reconocieron no ordenarla bien | 44  | 17,1       | 9,4    |
| <b>Preguntas relativas a la RCP</b>                                                                                |                                                                 |     |            |        |
| <i>¿Sabe realizar una RCP?</i>                                                                                     | Sí                                                              |     | 174 (37,0) |        |
|                                                                                                                    | No, pero he oído hablar de ello                                 |     | 287 (61,1) |        |
|                                                                                                                    | No, y nunca he oído hablar de ello                              |     | 9 (1,9)    |        |
| <b>De los que respondieron que sí (n = 174)</b>                                                                    |                                                                 | fi  | hi-174     | hi-470 |
| <i>El ratio compresión:ventilación en la RCP realizada a <u>un niño de seis años es...</u></i>                     | No se hacen ventilaciones                                       | 16  | 9,2        | 3,4    |
|                                                                                                                    | 5 ventilaciones iniciales y 30 compresiones y 2 ventilaciones   | 54  | 31,0       | 11,5   |
|                                                                                                                    | 5 ventilaciones iniciales y 15 compresiones y 2 ventilaciones   | 33  | 19,0       | 7,0    |
|                                                                                                                    | 15 compresiones y 1 ventilación                                 | 42  | 24,1       | 8,9    |
|                                                                                                                    | Los que aun diciendo que sabían, respondieron ("No sé")         | 29  | 16,7       | 6,2    |
| <i>La profundidad y el ritmo al que tengo que realizar las compresiones a <u>un niño de seis años...</u></i>       | 5 centímetros y 100-120 compresiones/min                        | 17  | 9,8        | 3,6    |
|                                                                                                                    | 4 centímetros y 90-110 compresiones/min                         | 27  | 15,5       | 5,7    |
|                                                                                                                    | 3 centímetros y 100-120 compresiones/min                        | 38  | 21,8       | 8,1    |
|                                                                                                                    | Ninguna                                                         | 6   | 3,4        | 1,3    |
|                                                                                                                    | Los que aun diciendo que sabían, respondieron ("No sé")         | 86  | 49,4       | 18,3   |
| <i>El ratio compresión:ventilación en la RCP realizada a <u>un niño de un año es...</u></i>                        | No se hacen ventilaciones                                       | 21  | 12,1       | 4,5    |
|                                                                                                                    | 5 ventilaciones iniciales y 30 compresiones y 2 ventilaciones   | 29  | 16,7       | 6,2    |
|                                                                                                                    | 5 ventilaciones iniciales y 15 compresiones y 2 ventilaciones   | 32  | 18,4       | 6,8    |
|                                                                                                                    | 15 compresiones y 1 ventilación                                 | 18  | 10,3       | 3,8    |
|                                                                                                                    | Los que aun diciendo que sabían, respondieron ("No sé")         | 74  | 42,5       | 15,7   |
| <i>La profundidad y el ritmo al que tengo que realizar las compresiones a <u>un niño de menos de un año...</u></i> | 5 centímetros y 100-120 compresiones/min                        | 0   | 0,0        | 0,0    |
|                                                                                                                    | 4 centímetros y 90-110 compresiones/min                         | 11  | 6,3        | 2,3    |
|                                                                                                                    | 3 centímetros y 100-120 compresiones/min                        | 55  | 31,6       | 11,7   |
|                                                                                                                    | Ninguna                                                         | 9   | 5,2        | 1,9    |
|                                                                                                                    | Los que aun diciendo que sabían, respondieron ("No sé")         | 99  | 56,9       | 21,1   |
| <b>Preguntas relativas al DESA y OVACE</b>                                                                         |                                                                 |     |            |        |
| <i>Un desfibrilador automático / semiautomático...</i>                                                             | Sé para qué sirve, pero no sé usarlo                            |     | 341 (72,6) |        |
|                                                                                                                    | Sé para qué sirve y sé usarlo                                   |     | 55 (11,7)  |        |
|                                                                                                                    | No sé usarlo, pero he oído hablar de ello                       |     | 66 (14,0)  |        |
|                                                                                                                    | Nunca he oído hablar de ello                                    |     | 8 (1,7)    |        |

|                                                                                   |                                                                    |            |        |        |
|-----------------------------------------------------------------------------------|--------------------------------------------------------------------|------------|--------|--------|
| <i>¿Sabría actuar ante un<br/>atragantamiento (obstrucción<br/>de vía aérea)?</i> | Sí                                                                 | 286 (60,9) |        |        |
|                                                                                   | No, pero he oído hablar de ello                                    | 184 (39,1) |        |        |
|                                                                                   | No, y nunca he oído hablar de ello                                 | 0 (0,0)    |        |        |
| <b>De los que contestaron que sí (n = 286)</b>                                    |                                                                    | fi         | hi-286 | hi-470 |
| <i>Ordene la secuencia<br/>numerando los pasos</i>                                | Los que lo hicieron bien                                           | 198        | 69,2   | 42,1   |
|                                                                                   | Los que lo hicieron mal                                            | 88         | 30,8   | 18,7   |
|                                                                                   | Los que aun diciendo que sabían,<br>reconocieron no ordenarla bien | 60         | 21,0   | 12,8   |

Datos expresados mediante frecuencias absolutas (frecuencias relativas)

fi: Frecuencia absoluta

hi: Frecuencia relativa
